# Supplementary material for: Glycolysis-enhancing α1-adrenergic antagonists modify cognitive symptoms related to Parkinson’s disease
Source: PubMed Central journal article supplement (PMC9981768; doi:10.1038/s41531-023-00477-1), 2023-03-02
Supplement: 41531_2023_477_MOESM1_ESM.pdf [file 41531_2023_477_MOESM1_ESM.pdf]

1 **Supplemental Table 1: Cohort Summary Measures Before and After Matching.** Values  
2 reported are median and inner quartile range for continuous variables or count and percent for  
3 binary variables. SMD is the standardized mean difference or Cohen's *d*, a measure of effect  
4 size. Balance was obtained (absolute value of SMD  $\leq 0.1$ ) on nearly all measures included in  
5 the propensity score model or the disease duration.

6

| Variable                               | Before Matching       |                           |       | After Matching       |                      |       |
|----------------------------------------|-----------------------|---------------------------|-------|----------------------|----------------------|-------|
|                                        | TZ/DZ/AZ<br>(n = 875) | Tamsulosin<br>(n = 4,756) | SMD   | TZ/DZ/AZ             | Tamsulosin           | SMD   |
| <b>Demographics and Timing</b>         |                       |                           |       |                      |                      |       |
| Age (years)                            | 72<br>(63, 80)        | 74<br>(64, 81)            | -0.08 | 72<br>(63, 80)       | 72<br>(62, 81)       | 0.01  |
| RX Start Year                          | 2003<br>(2001, 2006)  | 2004<br>(2001, 2008)      | -0.02 | 2004<br>(2001, 2006) | 2004<br>(2002, 2008) | 0.01  |
| Lookback (years)                       | 3.8<br>(2.2, 6.4)     | 4.8<br>(2.7, 7.8)         | -0.26 | 4.3<br>(2.5, 6.8)    | 3.9<br>(2.3, 6.0)    | 0.19  |
| Follow-Up (years)                      | 1.8<br>(0.9, 4.1)     | 2.0<br>(0.9, 2.8)         | -0.01 | 2.0<br>(0.9, 4.2)    | 1.9<br>(0.9, 4.1)    | 0.00  |
| PD Disease Duration (years)            | 2.35<br>(1.53, 3.99)  | 2.74<br>(1.72, 4.60)      | -0.18 | 2.57<br>(1.68, 4.25) | 2.47<br>(1.66, 3.97) | 0.10  |
| <b>Baseline Healthcare Utilization</b> |                       |                           |       |                      |                      |       |
| Inpatient Visits Per Year              | 0.14<br>(0.00, 1.34)  | 0.35<br>(0.00, 1.67)      | -0.10 | 0.25<br>(0.00, 1.41) | 0.13<br>(0.00, 1.48) | -0.13 |
| Outpatient Visits Per Year             | 17<br>(10, 27)        | 17<br>(10, 27)            | -0.01 | 17<br>(11, 28)       | 16<br>(9, 27)        | 0.01  |
| Mean Number of Unique DX               | 0.35<br>(0.20, 0.62)  | 0.31<br>(0.17, 0.57)      | 0.05  | 0.31<br>(0.19, 0.56) | 0.36<br>(0.21, 0.60) | -0.08 |
| Outpatient DX Code Incidence           | 22<br>(14, 38)        | 25<br>(15, 42)            | -0.10 | 23<br>(14, 39)       | 22<br>(12, 38)       | 0.00  |
| <b>Elixhauser Comorbidities</b>        |                       |                           |       |                      |                      |       |
| Alcohol Abuse                          | 12<br>(1.4%)          | 117<br>(2.5%)             | -0.07 | 12<br>(1.6%)         | 13<br>(1.7%)         | -0.01 |
| Anemia                                 | 219<br>(25.0%)        | 1,204<br>(25.3%)          | -0.01 | 201<br>(26.7%)       | 177<br>(23.5%)       | 0.07  |
| Blood Loss                             | 18<br>(2.1%)          | 130<br>(2.7%)             | -0.04 | 16<br>(2.1%)         | 15<br>(2.0%)         | 0.01  |
| Heart Failure                          | 156<br>(17.8%)        | 923<br>(19.4%)            | -0.04 | 138<br>(18.3%)       | 144<br>(19.1%)       | -0.02 |
| Coagulopathy                           | 50<br>(5.7%)          | 309<br>(6.5%)             | -0.03 | 46<br>(6.1%)         | 32<br>(4.2%)         | 0.09  |
| Depression                             | 143<br>(15.3%)        | 841<br>(17.7%)            | -0.06 | 127<br>(16.8%)       | 106<br>(14.1%)       | 0.08  |
| Diabetes W/O Complications             | 312<br>(35.7%)        | 1,545<br>(32.5%)          | 0.07  | 287<br>(38.1%)       | 247<br>(32.8%)       | 0.11  |
| Diabetes W/ Complications              | 146<br>(16.7%)        | 752<br>(15.8%)            | 0.02  | 134<br>(17.8%)       | 103<br>(13.7%)       | 0.11  |
| Drug Abuse                             | 8<br>(0.9%)           | 81<br>(1.7%)              | -0.06 | 6<br>(0.8%)          | 19<br>(2.5%)         | -0.14 |
| Fluid/Electrolyte Disorders            | 160<br>(18.3%)        | 993<br>(20.9%)            | -0.06 | 147<br>(19.5%)       | 138<br>(18.3%)       | 0.03  |
| HIV                                    | 3<br>(0.3%)           | 7<br>(0.1%)               | 0.05  | 3<br>(0.4%)          | 1<br>(0.1%)          | 0.05  |
| HTN W/O Complications                  | 623                   | 3,310                     | 0.04  | 555                  | 528                  | 0.08  |

|                                            |                |                  |       |                |                |       |
|--------------------------------------------|----------------|------------------|-------|----------------|----------------|-------|
| HTN W/ Complications                       | (71.2%)<br>169 | (69.6%)<br>875   | 0.02  | (73.6%)<br>159 | (70.0%)<br>134 | 0.08  |
| Hypothyroidism                             | (19.3%)<br>97  | (18.4%)<br>641   | -0.07 | (21.1%)<br>95  | (17.8%)<br>97  | -0.01 |
| Liver Disease                              | (11.1%)<br>38  | (13.5%)<br>210   | 0.00  | (12.6%)<br>36  | (12.9%)<br>29  | 0.05  |
| Lymphoma                                   | (4.3%)<br>20   | (4.4%)<br>94     | 0.02  | (4.8%)<br>20   | (3.8%)<br>13   | 0.06  |
| Metastatic Cancer                          | (2.3%)<br>14   | (2.0%)<br>120    | -0.06 | (2.7%)<br>14   | (1.7%)<br>18   | -0.04 |
| Other Neurological Disorders               | (1.6%)<br>626  | (2.5%)<br>3,788  | -0.20 | (1.9%)<br>548  | (2.4%)<br>511  | 0.11  |
| Obesity                                    | (71.5%)<br>45  | (79.6%)<br>381   | -0.11 | (72.7%)<br>44  | (67.8%)<br>33  | 0.07  |
| Paralysis                                  | (5.1%)<br>39   | (8.0%)<br>267    | -0.05 | (5.8%)<br>36   | (4.4%)<br>29   | 0.05  |
| Pulmonary/Circ Disorders                   | (4.5%)<br>38   | (5.6%)<br>244    | -0.04 | (4.8%)<br>35   | (3.8%)<br>42   | -0.04 |
| Psychoses                                  | (4.3%)<br>94   | (5.1%)<br>568    | -0.04 | (4.6%)<br>89   | (5.6%)<br>81   | 0.03  |
| Peptic Ulcer Disease                       | (10.7%)<br>2   | (11.9%)<br>22    | -0.04 | (11.8%)<br>2   | (10.7%)<br>3   | -0.02 |
| COPD                                       | (0.2%)<br>256  | (0.5%)<br>1,536  | -0.07 | (0.3%)<br>226  | (0.4%)<br>220  | 0.02  |
| Peripheral Vascular Disease                | (29.3%)<br>205 | (32.3%)<br>1,329 | -0.10 | (30.0%)<br>193 | (29.2%)<br>179 | 0.04  |
| Renal Failure                              | (23.4%)<br>124 | (27.9%)<br>507   | 0.11  | (25.6%)<br>117 | (23.7%)<br>108 | 0.03  |
| Rheumatoid Arthritis                       | (14.2%)<br>44  | (10.7%)<br>410   | -0.13 | (15.5%)<br>40  | (14.3%)<br>40  | 0.00  |
| Solid Tumor                                | (5.0%)<br>152  | (8.6%)<br>991    | -0.09 | (5.3%)<br>130  | (5.3%)<br>133  | -0.01 |
| Valvular Disease                           | (17.4%)<br>176 | (20.8%)<br>1,193 | -0.12 | (17.2%)<br>170 | (17.6%)<br>158 | 0.04  |
| Weight Loss                                | (20.1%)<br>67  | (25.1%)<br>501   | -0.10 | (22.5%)<br>57  | (21.0%)<br>64  | -0.03 |
|                                            | (7.7%)         | (10.5%)          |       | (7.6%)         | (8.5%)         |       |
| <b>Prescribing Specific Considerations</b> |                |                  |       |                |                |       |
| <b>Indications</b>                         |                |                  |       |                |                |       |
| PSA Measurement Taken                      | 411            | 1,998            | 0.10  | 348            | 343            | 0.01  |
|                                            | (47.0%)        | (42.0%)          |       | (46.2%)        | (45.5%)        |       |
| Abnormal PSA                               | 109            | 721              | -0.08 | 95             | 103            | -0.03 |
|                                            | (12.5%)        | (15.2%)          |       | (12.6%)        | (13.7%)        |       |
| Slow Urinary Stream                        | 25             | 139              | 0.00  | 23             | 19             | 0.03  |
|                                            | (2.9%)         | (2.9%)           |       | (3.1%)         | (2.5%)         |       |
| Uroflow Study                              | 89             | 424              | 0.04  | 84             | 62             | 0.10  |
|                                            | (10.2%)        | (8.9%)           |       | (11.1%)        | (8.2%)         |       |
| Cystometrogram                             | 29             | 118              | 0.05  | 25             | 21             | 0.03  |
|                                            | (3.3%)         | (2.5%)           |       | (3.3%)         | (2.8%)         |       |
| Diagnosis of BPH                           | 365            | 2,043            | -0.03 | 323            | 305            | 0.05  |
|                                            | (41.7%)        | (43.0%)          |       | (42.8%)        | (40.5%)        |       |
| <b>Adverse Event Risks</b>                 |                |                  |       |                |                |       |
| Orthostatic Hypotension                    | 28             | 276              | -0.12 | 27             | 35             | -0.05 |
|                                            | (3.2%)         | (5.8%)           |       | (3.6%)         | (4.6%)         |       |
| Other Hypotension                          | 45             | 375              | -0.10 | 41             | 35             | -0.04 |
|                                            | (5.1%)         | (7.9%)           |       | (5.4%)         | (4.6%)         |       |
